# Supplementary material for: Group size experiences with enhanced pre- and postnatal development studies in the long-tailed macaque (&lt;i&gt;Macaca fascicularis&lt;/i&gt;)
Source: Copernicus journal article supplement (doi:10.5194/pb-7-1-2020), 2020-03-11
Supplement: Supplementary file 1 [file pb-7-1-2020-supplement.zip]

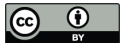

## *Supplement of*

# **Group size experiences with enhanced pre- and postnatal development studies in the long-tailed macaque (*Macaca fascicularis*)**

C. Marc Luetjens et al.

*Correspondence to:* Gerhard Weinbauer ([gerhard.weinbauer@covance.com](mailto:gerhard.weinbauer@covance.com))

- [pb-7-1-2020-supplement-title-page.pdf](#)
- [supplement data for Figure 1.xlsx](#)
- [supplement data for Figure 3.xlsx](#)

The copyright of individual parts of the supplement might differ from the CC BY 4.0 License.
