# Supplementary material for: Group size experiences with enhanced pre- and postnatal development studies in the long-tailed macaque (Macaca fascicularis)
Source: Primate Biol. 2020 Mar 11;7(1):1–4. doi: 10.5194/pb-7-1-2020 (PMC7096737; doi:10.5194/pb-7-1-2020)
Supplement: The supplement related to this article is available online at: https://doi.org/10.5194/pb-7-1-2020-supplement. [file pb-7-1-supplement.zip › supplement data for Figure 1.xlsx]

## Sheet: Sheet1
Figure 1
Prenatal loss, still and postnatal until postnatal day 7 (PND7)
Study no.	Pregnant animals [N]	Prenatal loss		Stillbirth		Postnatal loss PND7
		[N]	[%]	[N]	[%]	[N]	[%]
GA1	22	3	13.6364	0	0	4	18.1818
GA2	24	3	12.5	2	8.33333	0	0
GA3	18	1	5.55556	4	22.2222	1	5.55556
GA4	20	1	5	3	15	0	0
GA5	14	2	14.2857	1	7.14286	1	7.14286
GA6	20	1	5	0	0	0	0
GA7	16	3	18.75	3	18.75	1	6.25
GA8	20	4	20	3	15	0	0
GA9	16	3	18.75	1	6.25	1	6.25
GA10	16	1	6.25	3	18.75	2	12.5
GA11	16	3	18.75	0	0	1	6.25
GA12	14	2	14.2857	0	0	2	14.2857
GA13	16	1	6.25	2	12.5	2	12.5
MA1	18	0	0	3	16.6667	0	0
MA2	20	5	25	2	10	2	10
MA3	22	7	31.8182	1	4.54545	2	9.09091
MA4	25	2	8	1	4	0	0
MA5	18	3	16.6667	0	0	3	16.6667
MA6	16	1	6.25	0	0	0	0
MA7	14	2	14.2857	0	0	2	14.2857
MA8	16	4	25	2	12.5	0	0
Median	18	2	14.2857	1	7.14286	1	6.25
Cumulative	18.1429	52	13.6483	31	8.13648	24	6.29921
