# Supplementary material for: Group size experiences with enhanced pre- and postnatal development studies in the long-tailed macaque (Macaca fascicularis)
Source: Primate Biol. 2020 Mar 11;7(1):1–4. doi: 10.5194/pb-7-1-2020 (PMC7096737; doi:10.5194/pb-7-1-2020)
Supplement: The supplement related to this article is available online at: https://doi.org/10.5194/pb-7-1-2020-supplement. [file pb-7-1-supplement.zip › supplement data for Figure 3.xlsx]

## Sheet: Tabelle1
Figure 3
Study	Live Infant Number PND7	male:female ratio
GA1	15	2
GA2	19	1.7
GA3	12	1
GA4	16	1.3
GA5	10	1.5
GA6	19	1.4
GA7	9	0.8
GA8	13	0.86
GA9	11	0.6
GA10	11	1.2
GA11	12	1
GA12	10	1
GA13	10	1.5
MA1	15	2
MA2	12	2
MA3	22	0.8
MA4	12	0.7
MA5	12	3
MA6	15	0.7
MA7	10	1.5
MA8	9	3.5
pearson	-0.136525
